# Supplementary material for: Storing carbon in leaf lipid sinks enhances perennial ryegrass carbon capture especially under high N and elevated CO2
Source: PubMed Central journal article supplement — J Exp Bot. 2019 Nov 3;71(7):2351–61. doi: 10.1093/jxb/erz494 (PMC7134912; doi:10.1093/jxb/erz494), 2019-11-03
Supplement: erz494_suppl_supplementary-figures_s1-s3-and-tables_s1-s4.pdf [file erz494_suppl_supplementary-figures_s1-s3-and-tables_s1-s4.pdf]

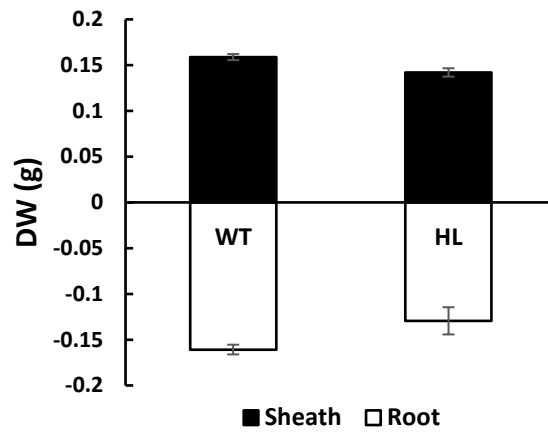

**Supplementary Figure S1.** sheath and root DW of a defoliated clonal cys-OLE/DGAT ryegrass transformant (HL) and a wild type control (WT) genotype. Plants were established from 3-4 tillers for 23 days at 2mM  $\text{NO}_3^-$  supply at ambient  $\text{CO}_2$ . Bars represent the average for each genotype ( $n=5$ )  $\pm$  S.E. \* = denotes a significant difference at the  $p<0.05$  level in DW, according to student's t test.

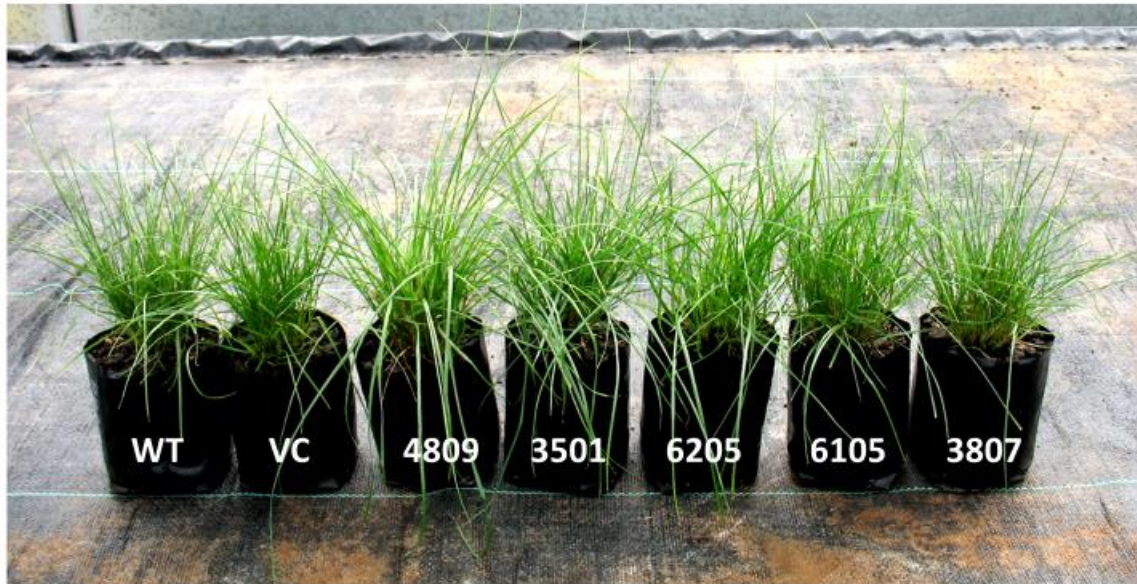

**Supplemental Figure S2.** visual comparison of shoot regrowth of *cys-OLE/DGAT* transformants with a WT and VC genotype. Ramets consisting of 5 tillers were placed in pots and trimmed to an even height every 3 weeks for 3 months.

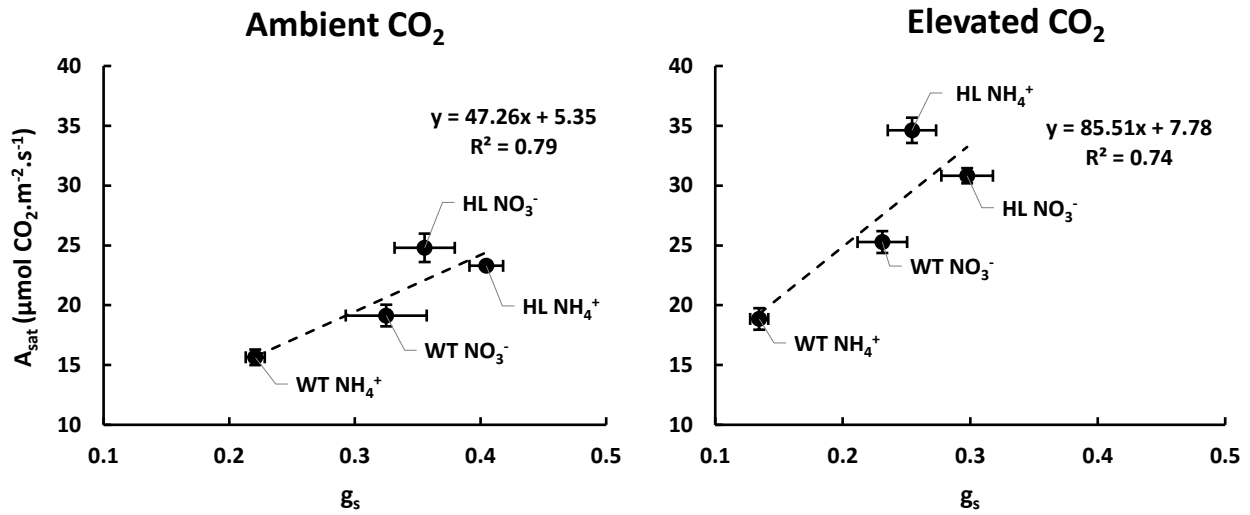

**Supplementary Figure S3.** relationship between light saturated photosynthetic rate per unit leaf area ( $A_{\text{sat}}$ ) and stomatal conductance ( $g_s$ ) of a clonal *cys*-OLE/DGAT ryegrass transformant (HL) and a wild type control (WT) genotype. Plants were regrown for 28-29 days after defoliation at 7.5 mM N supply at either ambient (400 ppm) and elevated CO<sub>2</sub> (760 ppm). Data points represent the averages of plants grown under NO<sub>3</sub><sup>-</sup> or NH<sub>4</sub><sup>+</sup> ( $n=5$ )  $\pm$  S.E.

| A)      | $\Gamma^*$<br>experiment |                                                                 | B)           | $F_v/F_m$<br>experiment |                     |                                                                             |
|---------|--------------------------|-----------------------------------------------------------------|--------------|-------------------------|---------------------|-----------------------------------------------------------------------------|
|         | $\Gamma^*$<br>(ppm)      | $R_i$<br>( $\mu\text{mol CO}_2 \text{ m}^{-2} \text{ s}^{-1}$ ) |              | $F_v/F_m$               | $\Phi \text{ PSII}$ | $A_{\text{area}}$<br>( $\mu\text{mol CO}_2 \text{ m}^{-2} \text{ s}^{-1}$ ) |
| WT      | 27.87 ± 1.48             | 0.71 ± 0.07                                                     | 0.79 ± 0.003 | 0.48 ± 0.01             | 17.83 ± 0.40        |                                                                             |
| HL      | 35.50 ± 1.11             | 0.41 ± 0.05                                                     | 0.80 ± 0.002 | 0.51 ± 0.01             | 20.63 ± 0.89        |                                                                             |
| p value | **                       | **                                                              | *            | **                      | *                   |                                                                             |

**Supplementary Table S1.** CO<sub>2</sub> compensation point in the absence of dark respiration in the light ( $\Gamma^*$ ) and  $F_v/F_m$  measured alongside the quantum efficiency of photosystem II ( $\Phi \text{ PSII}$ ) and photosynthesis ( $A_{\text{area}}$ ) of a clonal cys-OLE/DGAT ryegrass transformant (HL) and a wild type control (WT) genotype. Measurements were taken in two separate regrowth experiments, approximately 3 weeks after the defoliation of vegetative clones grown in potting mix. Values represent raw averages ± S.E. ( $n=6$  for  $\Gamma^*$  experiment,  $n=10$  for  $F_v/F_m$  experiment). p values are from Welch two sample t-tests or Wilcoxon rank sum test. \* =  $p < 0.05$ , \*\* =  $p < 0.01$ .

| Genotype | Total leaf FA (%DW) | Leaf TAG (%DW) | Total root FA (%DW) |
|----------|---------------------|----------------|---------------------|
| WT       | 3.49 ± 0.07 A       | 0.18 ± 0.03 A  | 0.66 ± 0.01 A       |
| VC       | 3.50 ± 0.13 A       | 0.23 ± 0.02 A  | 0.73 ± 0.01 B       |
| 3501     | 5.56 ± 0.06 B       | 2.20 ± 0.06 B  | 0.99 ± 0.01 C       |
| 3807     | 6.69 ± 0.07 C       | 2.47 ± 0.06 C  | 0.97 ± 0.01 C       |
| p value  | **                  | ***            | ***                 |

**Supplementary Table S2.** total leaf fatty acid (FA), leaf triacylglycerol (TAG) and total root FA of a wild type (WT) and vector control (VC) and two independent *cys-OLE/DGAT* ryegrass transformants, from leaves 3 weeks after cutting and roots 3 months after propagation. Values are expressed on a %DW basis and represent raw averages ± S.E. ( $n=4-8$ ). \*\* =  $p < 0.01$ , \*\*\* =  $p < 0.001$  effect significant according to Kruskal-Wallis test. Different letters indicate statistically significant differences in predicted means obtained from Wilcoxon rank sum test, with p values adjusted according to BH method.

| CO <sub>2</sub> | Genotype          | V <sub>cmax</sub><br>( $\mu\text{mol}\cdot\text{m}^{-2}\cdot\text{s}^{-1}$ ) | J<br>( $\mu\text{mol}\cdot\text{m}^{-2}\cdot\text{s}^{-1}$ ) | g <sub>m</sub><br>( $\mu\text{mol}\cdot\text{m}^{-2}\cdot\text{s}^{-1}\cdot\text{pa}^{-1}$ ) | V <sub>cmax</sub> /J | Model fit   |
|-----------------|-------------------|------------------------------------------------------------------------------|--------------------------------------------------------------|----------------------------------------------------------------------------------------------|----------------------|-------------|
| Ambient         | WT                | 161.78 ± 9.77 A                                                              | 178.08 ± 8.92 A                                              | 1.39 ± 0.17 A                                                                                | 0.91 ± 0.03 A        | 0.41 ± 0.10 |
|                 | HL                | 112.86 ± 7.46 BC                                                             | 171.73 ± 6.07 A                                              | 4.29 ± 0.51 B                                                                                | 0.65 ± 0.02 C        | 0.51 ± 0.13 |
| Elevated        | WT                | 122.48 ± 4.74 B                                                              | 160.76 ± 3.26 A                                              | 1.30 ± 0.09 A                                                                                | 0.76 ± 0.02 B        | 1.56 ± 0.24 |
|                 | HL                | 97.46 ± 5.24 C                                                               | 165.66 ± 4.71 A                                              | 5.17 ± 1.18 B                                                                                | 0.59 ± 0.02 C        | 2.39 ± 0.68 |
| ANOVA           | G                 | ***                                                                          | -                                                            | ***                                                                                          | ***                  |             |
|                 | CO <sub>2</sub>   | **                                                                           | -                                                            | -                                                                                            | **                   |             |
|                 | GxCO <sub>2</sub> | -                                                                            | -                                                            | -                                                                                            | -                    |             |

**Supplementary Table S3.** maximum velocity of rubisco carboxylation (V<sub>c,max</sub>), rate of electron transport (J), and mesophyll conductance to CO<sub>2</sub> (g<sub>m</sub>) derived from modelling the response of net photosynthesis per unit leaf area (A) to intracellular CO<sub>2</sub> concentration (C<sub>i</sub>) of a clonal cys-OLE/DGAT ryegrass transformant (HL) and a wild type control (WT) genotype. Plants were regrown at 5mM NO<sub>3</sub><sup>-</sup> supply under ambient CO<sub>2</sub> (400 ppm) and at 7.5mM NO<sub>3</sub><sup>-</sup> supply under elevated CO<sub>2</sub> (760 ppm). Values represent raw averages (n=5) ± S.E. G = genotype effect, CO<sub>2</sub> = CO<sub>2</sub> effect significant in a two-way ANOVA. \* = p<0.05, \*\* = p<0.01, \*\*\* = p<0.001. Different letters indicate statistically significant differences in predicted means obtained from two-way ANOVA, with p values adjusted according to BH method.

| CO <sub>2</sub> | Genotype          | SLA<br>(cm <sup>2</sup> .g.DW <sup>-1</sup> ) | A <sub>sat</sub><br>(μmol CO <sub>2</sub> .m <sup>-2</sup> .s <sup>-1</sup> ) | Leaf FA<br>(mg/gDW) | Leaf WSC<br>(mg/gDW) |
|-----------------|-------------------|-----------------------------------------------|-------------------------------------------------------------------------------|---------------------|----------------------|
| Ambient         | WT                | 249 ± 15 BC                                   | 19.8 ± 1.5 C                                                                  | 24.8 ± 0.76 C       | 156.2 ± 18.2 B       |
|                 | 3501              | 310 ± 24 AB                                   | 26.0 ± 0.6 B                                                                  | 41.1 ± 2.02 AB      | ND                   |
|                 | 6205 (HL)         | 369 ± 12 A                                    | 27.1 ± 2.3 B                                                                  | 46.2 ± 0.56 A       | 86.9 ± 13.8 C        |
| Elevated        | WT                | 196 ± 9 C                                     | 22.3 ± 1.9 BC                                                                 | 22.7 ± 0.07 C       | 236.1 ± 10.3 A       |
|                 | 3501              | 266 ± 22 B                                    | 36.4 ± 1.5 A                                                                  | 38.8 ± 2.41 B       | ND                   |
|                 | 6205 (HL)         | 300 ± 8 B                                     | 37.0 ± 1.6 A                                                                  | 43.6 ± 1.34 AB      | 97.2 ± 5.6 C         |
| ANOVA           | G                 | ***                                           | ***                                                                           | ***                 | ***                  |
|                 | CO <sub>2</sub>   | **                                            | ***                                                                           | -                   | **                   |
|                 | GxCO <sub>2</sub> | -                                             | *                                                                             | -                   | *                    |

**Supplementary Table S4.** specific leaf area (SLA), light saturated photosynthetic rate per unit leaf area (A<sub>sat</sub>), leaf fatty acid (FA) and leaf water soluble carbohydrates (WSC) of two clonal cys-OLE/DGAT ryegrass lines; 3501 and 6205 (HL) and a wild type control (WT) genotype. Plants were regrown for 33-34 days after defoliation at 5 mM NO<sub>3</sub><sup>-</sup> supply at either ambient (400 ppm) or elevated CO<sub>2</sub> (760 ppm). Data points represent raw averages ( $n=4-6$ ) ± S.E. G = genotype effect, CO<sub>2</sub> = CO<sub>2</sub> effect significant in a two-way ANOVA. \* = p<0.05, \*\* = p<0.01, \*\*\* = p<0.001. Different letters indicate statistically significant differences in predicted means obtained from two-way ANOVA, with p values adjusted according to BH method.
